# Supplementary material for: Oxygen-doped and nitrogen vacancy co-modified carbon nitride for the efficient visible light photocatalytic hydrogen evolution
Source: Royal Society of Chemistry journal article supplement (doi:10.1039/d0nj03695a), 2020-01-01
Supplement: d0nj03695a1.pdf [file d0nj03695a1.pdf]

## Supporting Information

### **Oxygen-doped and nitrogen vacancy co-modified carbon nitride for efficient visible light photocatalytic hydrogen evolution**

Yuanyuan Yang <sup>a</sup>, Wenting Guo <sup>a</sup>, Yunpu Zhai <sup>a, \*</sup>, Qianwei Jin <sup>a</sup>, Hao Zhao <sup>a</sup>, Ruiqin  
Zhang <sup>b</sup>, Yonggang Liu <sup>a, b, \*</sup>

<sup>a</sup> Green Catalysis Center, College of Chemistry, Zhengzhou University, Zhengzhou,  
Henan 450001, PR China

<sup>b</sup> College of Ecology and Environment, Zhengzhou University, Zhengzhou, Henan  
450001, PR China

\* Corresponding authors: yunpu.zhai@zzu.edu.cn (Y.P. Zhai); ygliu@zzu.edu.cn (Y.  
G. Liu)

Journal to be published: *New Journal of Chemistry* (Manuscript ID NJ-ART-07-  
**2020-003695**)

Total No. of Pages: 5 (Pages S1-S5).

Total No of Tables: 2 (Table S1-S2).

References: 9 (ref S1-S5)

Contents:

|                                                                             |    |
|-----------------------------------------------------------------------------|----|
| Table S1. Elemental analysis of samples CN, DCN and ODCN.....               | S3 |
| Table S2. The comparison of our performance with other similar systems..... | S4 |
| References S1-S5 .....                                                      | S5 |

Table S1. Elemental analysis of samples CN, DCN and ODCN

| <b>Photocatalyst</b> | <b>C (%)</b> | <b>N (%)</b> | <b>O (%)</b> | <b>H (%)</b> | <b>C/N</b> |
|----------------------|--------------|--------------|--------------|--------------|------------|
| CN                   | 34.50        | 61.53        | 2.54         | 1.43         | 0.561      |
| DCN                  | 35.38        | 60.89        | 2.05         | 1.68         | 0.581      |
| ODCN                 | 35.36        | 60.66        | 2.50         | 1.48         | 0.583      |

Table S2. The comparison of our performance with other system

| <b>Photocatalyst</b> | <b>Light source</b> | <b>Reaction product</b> | <b>Reaction rate</b>                        | <b>Reference</b> |
|----------------------|---------------------|-------------------------|---------------------------------------------|------------------|
| P-CN1                | $\lambda > 420$ nm  | H <sub>2</sub>          | 122.8<br>$\mu\text{molh}^{-1}\text{g}^{-1}$ | (S1)             |
| U-CN-3               | $\lambda > 420$ nm  | H <sub>2</sub>          | 348<br>$\mu\text{molh}^{-1}\text{g}^{-1}$   | (S2)             |
| CN1                  | $\lambda > 400$ nm  | H <sub>2</sub>          | 170<br>$\mu\text{molh}^{-1}\text{g}^{-1}$   | (S3)             |
| CNQ680               | $\lambda > 440$ nm  | H <sub>2</sub>          | 310<br>$\mu\text{molh}^{-1}\text{g}^{-1}$   | (S4)             |
| LB-CN                | $\lambda > 420$ nm  | H <sub>2</sub>          | 226<br>$\mu\text{molh}^{-1}\text{g}^{-1}$   | (S5)             |
| ODCN                 | $\lambda > 420$ nm  | H <sub>2</sub>          | 364<br>$\mu\text{molh}^{-1}\text{g}^{-1}$   | Our work         |

## References

- (S1) Y. Jiang, Z. Sun, C. Tang, Y. Zhou, L. Zeng and L. Huang, *Applied Catalysis B: Environmental*, 2019, **240**, 30-38.
- (S2) C. Dong, Z. Ma, R. Qie, X. Guo, C. Li, R. Wang, Y. Shi, B. Dai and X. Jia, *Applied Catalysis B: Environmental*, 2017, **217**, 629-636.
- (S3) J. Huang, Y. Cao, H. Wang, H. Yu, F. Peng, H. Zou and Z. Liu, *Chemical Engineering Journal*, 2019, **373**, 687-699.
- (S4) P. Niu, M. Qiao, Y. Li, L. Huang and T. Zhai, *Nano Energy*, 2018, **44**, 73-81.
- (S5) X. Shan, G. Ge and Z. Zhao, *Energy Technology*, 2019, **7**, 1800886.
